# Supplementary material
Source: PubMed Central journal article supplement (PMC7965194)
Supplement: 3588_table.pdf [file 3588_table.pdf]

**On-line Table: Imaging findings and follow-up in 6 children with enlarged subarachnoid spaces and subdural collections**

| Patient | Imaging | Location                             | Size, mm         | CT Appearance                                        | MR Appearance <sup>a</sup>                                                                                                             | Morphology                   | Hemorrhage <sup>b</sup> | Follow-Up <sup>c</sup>                      |
|---------|---------|--------------------------------------|------------------|------------------------------------------------------|----------------------------------------------------------------------------------------------------------------------------------------|------------------------------|-------------------------|---------------------------------------------|
| 1       | CT/MR   | Bilateral Frontal Convexity          | R: 9.6<br>L: 6.4 | CSF: sl hyper<br>Brain: hypo<br>Homogeneous          | T1: sl hyper(CSF), hypo (brain)<br>PD: hyper (CSF), hyper (brain)<br>T2: sl hyper (CSF), hyper (brain)<br>GRE: No blooming             | Two components<br>Septations | Not definite            | L resolved<br>R smaller<br>7 mo             |
| 2       | MR      | Uni: R<br>Parietal                   | 1.0              | NP                                                   | T1: iso (CSF), hypo (brain)<br>PD: hyper (CSF), hypo (brain)<br>T2: sl hyper (CSF), hyper (brain)<br>GRE: NP                           | Homogeneous<br>One component | Not definite            | None                                        |
| 3       | MR      | Uni: L<br>Frontal Convexity          | 3.0              | NP                                                   | T1: iso (CSF), hypo (brain)<br>PD: hyper (CSF), hyper (brain)<br>T2: sl hyper (CSF), hyper (brain)<br>GRE: No blooming                 | Homogeneous<br>One component | Not definite            | Resolved<br>3 mo                            |
| 4       | CT/MR   | Bilateral Frontal Parietal Convexity | R: 9.0<br>L: 8.5 | CSF: sl hyper<br>Brain: hypo<br>Localized hemorrhage | T1: mixed (CSF), mixed (brain)<br>PD: hyper (CSF), hyper (brain)<br>T2: mixed (CSF), mixed (brain)<br>GRE: layering and focal blooming | Heterogeneous                | Yes                     | Slightly smaller<br>Evolving signal<br>2 mo |
| 5       | MR      | Uni: R                               | 1.6              | NP                                                   | T1: sl hyper (CSF), hypo (brain)<br>PD: hyper (CSF), iso (brain)<br>T2: hyper (CSF), hyper (brain)<br>GRE: No blooming                 | Homogeneous<br>One component | Not definite            | Resolved<br>11 mo                           |
| 6       | MR      | Uni: R                               | 4.0              | NP                                                   | T1: sl hyper (CSF), hypo (brain)<br>PD: sl hyper (CSF), iso (brain)<br>T2: iso (CSF), hyper (brain)<br>GRE: No blooming                | Homogeneous<br>One component | Not definite            | Resolved<br>3 mo                            |

**Note:**—Uni indicates unilateral; NP, not performed; R, right; L, left; sl hyper, slightly hyperintense/hyperdense; hypo, hypointense/hypodense; hyper, hyperintense/hyperdense; mixed, components with different signal intensities; PD, proton density; GRE blooming, susceptibility effect identified; iso, isointense.

<sup>a</sup> MR appearance indicates MR signal relative to CSF or gray matter (brain).

<sup>b</sup> Hemorrhage indicates density and/or signal characteristics consistent with hemorrhage.

<sup>c</sup> Follow-up: Imaging follow-up, longest interval given from index examination.
